# Supplementary material for: The Vocal Repertoire of the African Penguin (Spheniscus demersus): Structure and Function of Calls
Source: PLOS journal article supplement (doi:10.1371/journal.pone.0103460), 2014-07-30
Supplement: S1 (10.1371/journal.pone.0103460.s001) [file journal.pone.0103460.s001]

Table S1. Published studies on the vocal repertoire of the African Penguin (*Spheniscus demersus*).

| Author(s)                    | Setting (wild/captive) | Number of penguins | Period of observation | Vocalisation                 | Behavioural context(s)                                                                                                      | Acoustic measurements | Spectrographic representation |
|------------------------------|------------------------|--------------------|-----------------------|------------------------------|-----------------------------------------------------------------------------------------------------------------------------|-----------------------|-------------------------------|
| Eggleton & Siegfried (1977)  | Wild                   | 130                | Year round            | <i>Ecstatic display song</i> | Territorial defence. This call was also suggested to signal availability for pairing and to communicate individual identity | No                    | No                            |
|                              |                        |                    |                       | <i>Aggressive braying</i>    | Aggression                                                                                                                  | No                    | No                            |
|                              |                        |                    |                       | <i>Hissing</i>               | Threat: emitted by chicks and juveniles towards external adults that approach the nest                                      | No                    | No                            |
|                              |                        |                    |                       | <i>Aggressive barking</i>    | Aggression: occurred between moulting juveniles and adults                                                                  | No                    | No                            |
|                              |                        |                    |                       | <i>Growling</i>              | Aggression: emitted simultaneously with pecking behaviour                                                                   | No                    | No                            |
|                              |                        |                    |                       | <i>Mutual display song</i>   | Reunion between members of the pair. This call was also observed as a stimulation to begging from parents to chicks         | No                    | No                            |
| Jouventin (1982)             | N/A                    | N/A                | N/A                   | <i>Ecstatic display song</i> | N/A                                                                                                                         | No                    | Yes                           |
|                              | Wild                   | 5                  | N/A                   | <i>Contact call</i>          | Visual isolation: for maintaining acoustic contact when floating on the sea surface                                         | No                    | No                            |
|                              | N/A                    | N/A                | N/A                   | <i>Mutual display song</i>   | N/A                                                                                                                         | No                    | Yes                           |
| Thumser <i>et al.</i> (1996) | Captive                | 12                 | Breeding season       | <i>Bray call</i>             | Territorial defence but also suggested as signalling availability for pairing                                               | Yes                   | No                            |

|                         |            |          |        |                  |                                                          |     |     |
|-------------------------|------------|----------|--------|------------------|----------------------------------------------------------|-----|-----|
| Thumser & Ficken (1998) | Captive 15 | Breeding | season | <i>Bray call</i> | Territorial defence but also for attracting partners     | Yes | Yes |
|                         |            |          |        | <i>Haw</i>       | Visual isolation: emitted to identify penguins' position | Yes | Yes |
|                         |            |          |        | <i>Yell</i>      | Aggression: emitted during agonistic encounters          | No  | No  |
|                         |            |          |        | <i>Throb</i>     | Emitted by pairs in the nest                             | No  | No  |
|                         |            |          |        | <i>Peep</i>      | Uttered by chicks in the nest as a food request          | No  | No  |

Note: N/A = information not available.

## References

- Eggleton P, Siegfried WR. (1977) Displays of the Jackass Penguin. *Ostrich* 50 (3): 139-167.
- Jouventin P. (1982) Visual and Vocal Signals in Penguins, Their Evolution and Adaptive Characters. *Adv Ethol* 58 (S24): 3-148.
- Thumser NN, Karron JD, Ficken MS. (1996) Interspecific variation in the call of *Spheniscus* penguins. *Wilson Bulletin* 108: 72-79.
- Thumser NN, Ficken MS. (1998). A comparison of the vocal repertoires of captive *Spheniscus* penguins. *Marine Ornithology* 26: 41-48.
